# Supplementary material for: A simple and cost-effective paper-based and colorimetric dual-mode detection of arsenic(iii) and lead(ii) based on glucose-functionalized gold nanoparticles
Source: Royal Society of Chemistry journal article supplement (doi:10.1039/d1ra02929k), 2021-01-01
Supplement: d1ra02929k1.pdf [file d1ra02929k1.pdf]

**Supplementary Material**

**A simple and cost effective paper-based and colorimetric dual-mode  
detection of arsenic (III) and lead (II) based on glucose functionalized  
gold nanoparticles**

**Bhuneshwari Sahu, Ramsingh Kurrey, Manas Kanti Deb\*, Kamlesh Shrivastava, Indrapal  
Karbhal, Beeta Rani Khalkho**

School of Studies in Chemistry, Pt. Ravishankar Shukla University, Raipur, CG-492010, India

**\*Corresponding Author**

Email: [debmanas@yahoo.com](mailto:debmanas@yahoo.com) (M. K. Deb)

Contact: +91 94255 03750

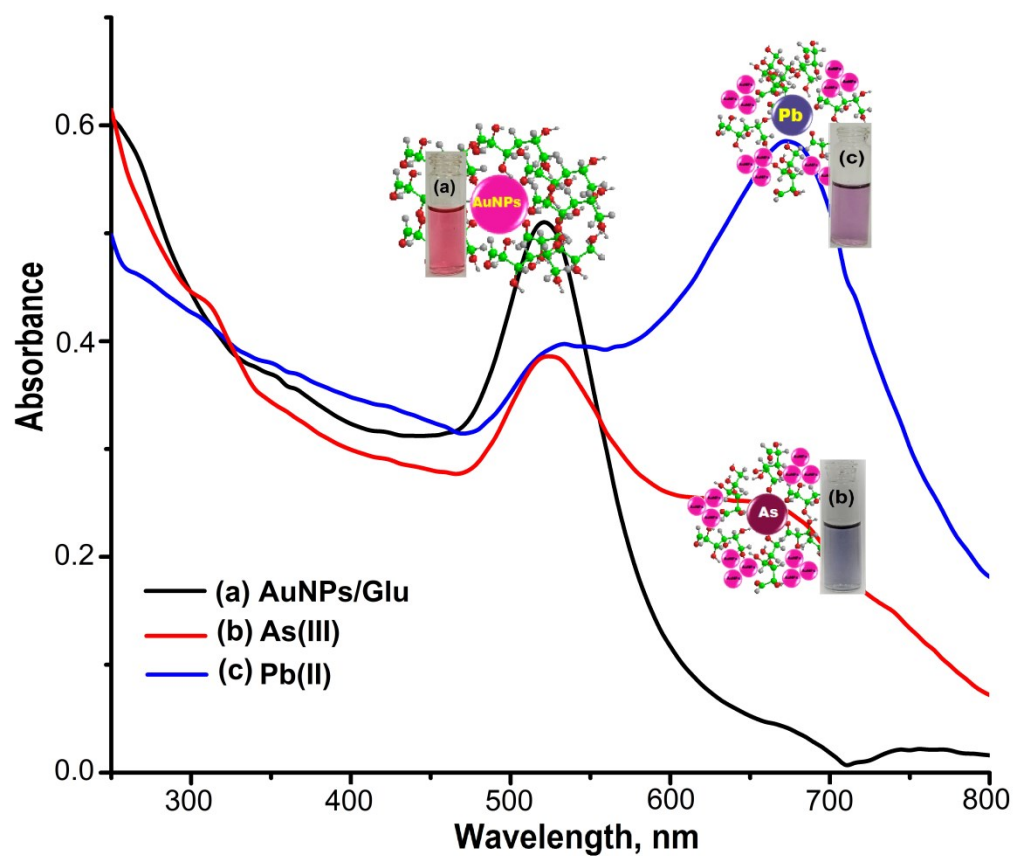

**Fig.S1** Glass vial containing (a) disperse AuNPs/Glu and aggregated AuNPs/Glu with As(III) and Pb(II) and their UV-Vis absorption spectra (b-c).

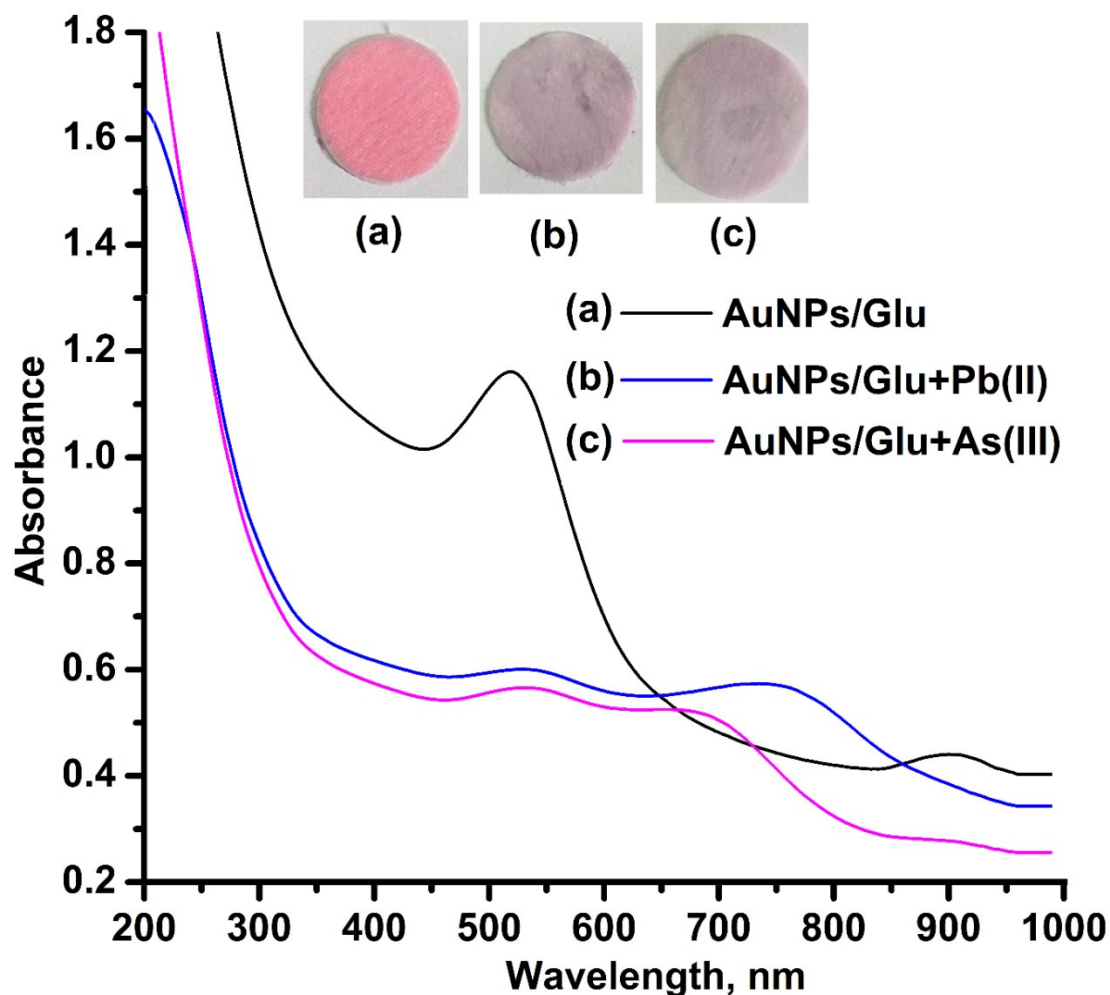

**Fig. S2.** Images of circular paper strips fabricated with AuNPs/Glu (a), Circular paper strip fabricated with AuNPs/Glu along with deposition of Pb(II) (b) and Circular paper strip fabricated with AuNPs/Glu along with deposition of As(III) (c) and their respective UV-Vis spectra (a-c).

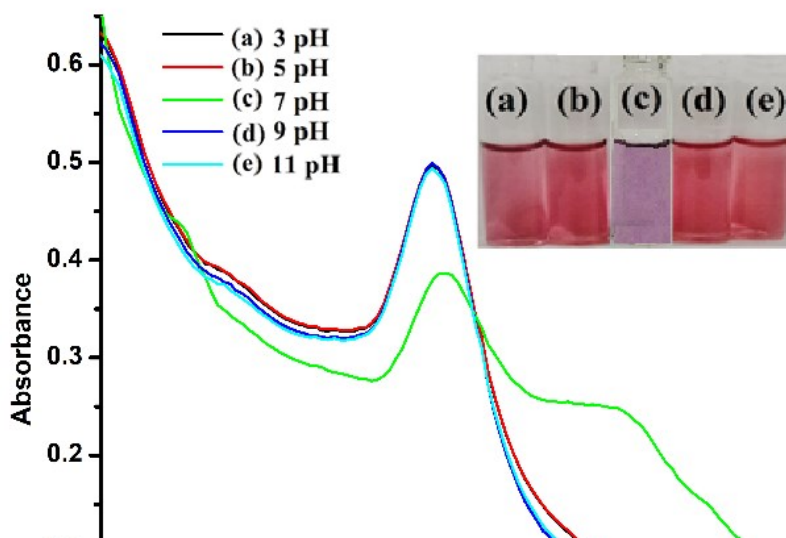

**Fig. S3.** Effect of pH on detection of the As(III) using AuNPs/Glu as a chemical probe.

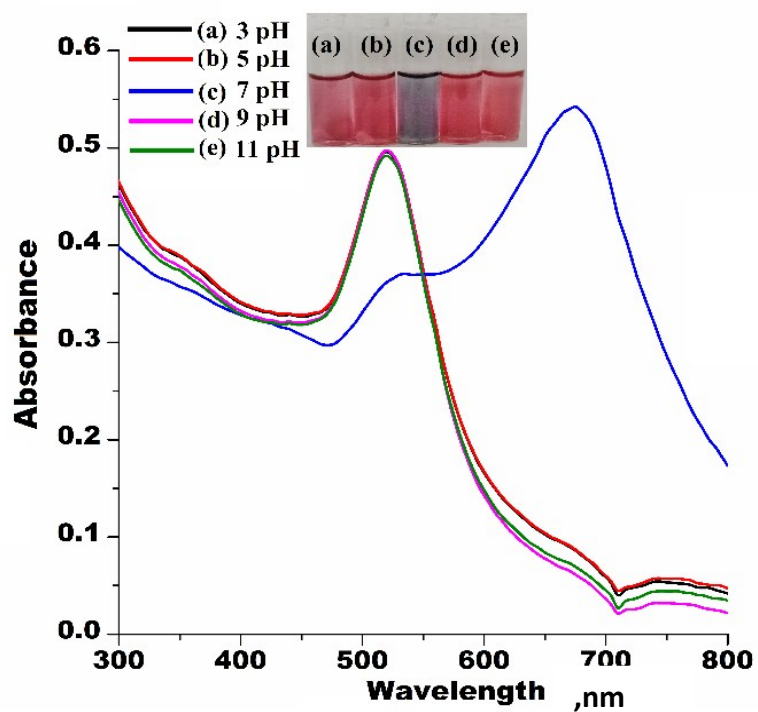

**Fig. S4.** Effect of pH on detection of the Pb(II) using AuNPs/Glu in colorimetric sensor

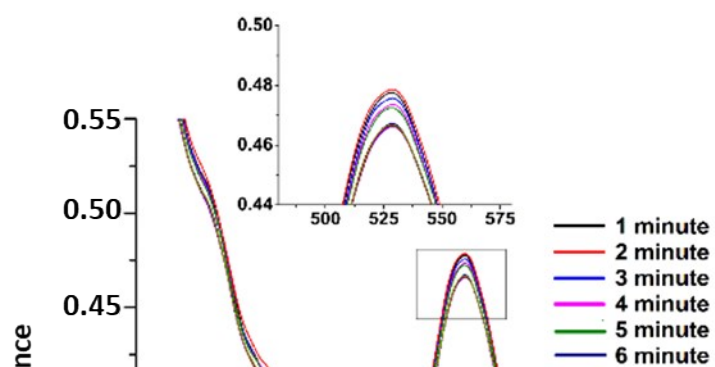

**Fig. S5.** Effect of reaction time for detection of As(III) using AuNPs/Glu in colorimetric sensor

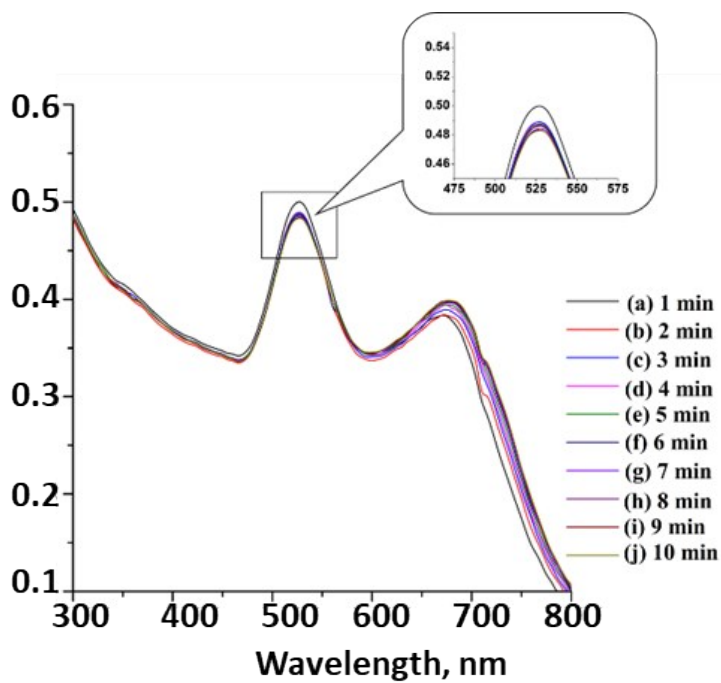

**Fig. S6.** Effect of reaction time on detection of Pb(II) using AuNPs/Glu in colorimetric sensor

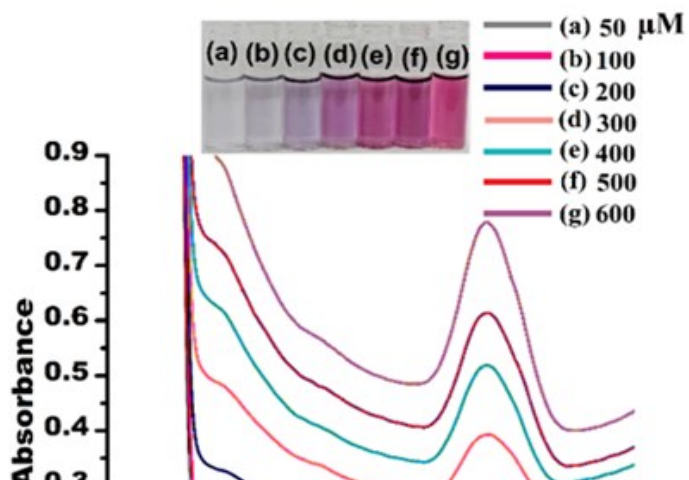

**Fig. S7.** UV-Vis spectral characteristics at different concentrations of AuNPs/Glu (50, 100, 200, 300, 400, 500 and 600  $\mu\text{M}$ ) with As(III)

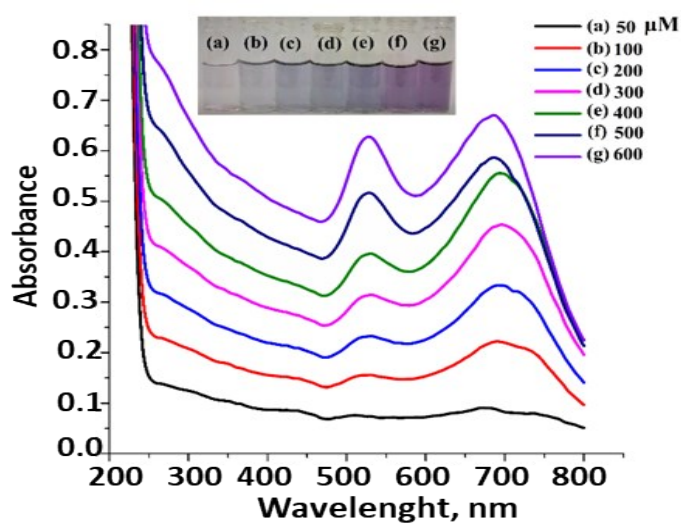

**Fig. S8.** UV-Vis spectral characteristics at different concentrations of AuNPs/Glu (50, 100, 200, 300, 400, 500 and 600  $\mu\text{M}$ ) with Pb(II)

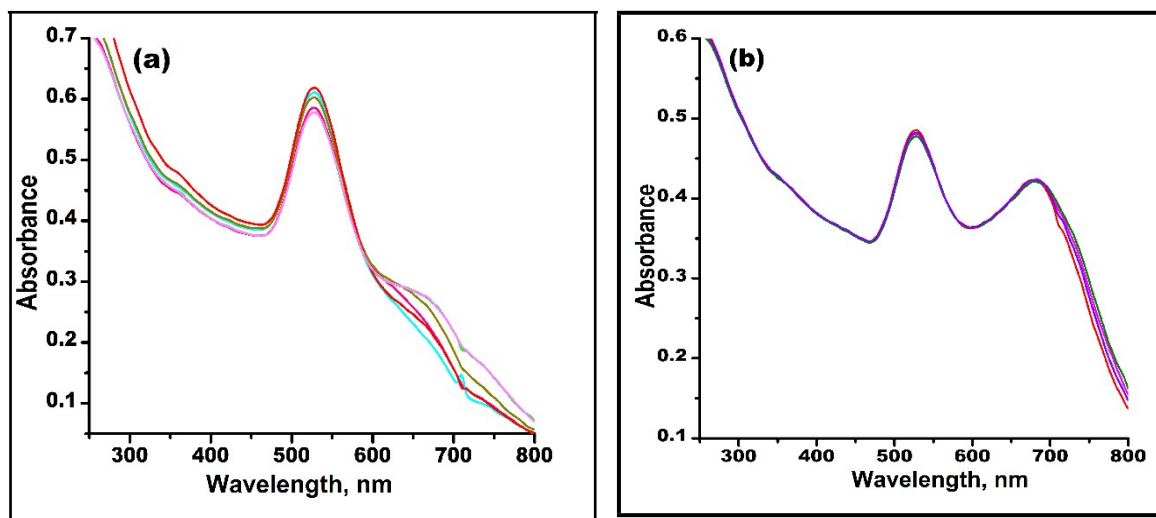

**Fig. S9.** Reproducibility curve for determination of As(III) and Pb(II) using AuNPs/Glu at 200 ng mL<sup>-1</sup> under the optimized condition.

**Table S1.** Effect of metal ions and anions for determination of As(III) and Pb(II) using AuNPs/Glu in environmental water samples

| Diverse ions                                                                | Tolerance limit, mgL <sup>-1</sup> |
|-----------------------------------------------------------------------------|------------------------------------|
| Cu(II), Cd(II), Pb(II), Fe(III), As(III), PO <sub>4</sub> <sup>3-</sup>     | 450                                |
| Mg(II), Ca(II), Ba(II), Hg(II), NO <sub>3</sub> <sup>-</sup>                | 650                                |
| Mn(II), Co(II), Ni(II), Al(III), SO <sub>4</sub> <sup>2-</sup>              | 750                                |
| Na(I), K(I), Zn(II), Cr(IV), Cl <sup>-</sup> , CO <sub>3</sub> <sup>-</sup> | 800                                |
